# Supplementary material for: Digital dissection and three-dimensional interactive models of limb musculature in the Australian estuarine crocodile (Crocodylus porosus)
Source: PubMed Central journal article supplement (PMC5383063; doi:10.1371/journal.pone.0175079), 2017-04-06

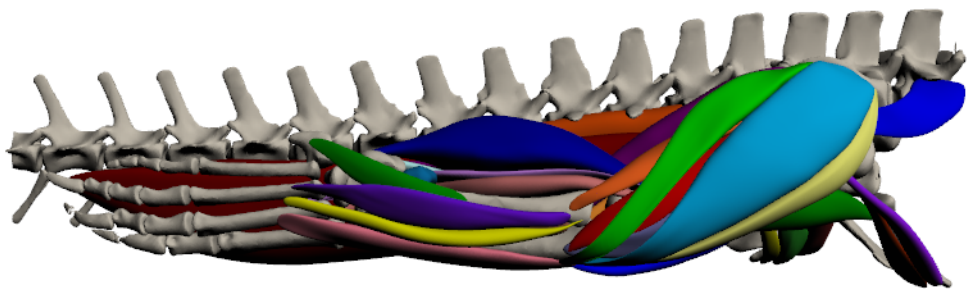

Supplement: pone.0175079.s002.pdf [file pone.0175079.s002.pdf]
